# Supplementary material
Source: PubMed Central journal article supplement (PMC7717845)
Supplement: ehp7045.s001.acco.pdf [file ehp7045.s001.acco.pdf]

**Note to readers with disabilities:** *EHP* strives to ensure that all journal content is accessible to all readers. However, some figures and Supplemental Material published in *EHP* articles may not conform to [508 standards](#) due to the complexity of the information being presented. If you need assistance accessing journal content, please contact [ehp508@niehs.nih.gov](mailto:ehp508@niehs.nih.gov). Our staff will work with you to assess and meet your accessibility needs within 3 working days.

### **Supplemental Material**

#### **Pathological Cardiopulmonary Evaluation of Rats Chronically Exposed to Traffic-Related Air Pollution**

Sabrina Edwards, Gang Zhao, Joanne Tran, Kelley T. Patten, Anthony Valenzuela, Christopher Wallis, Keith J. Bein, Anthony S. Wexler, Pamela J. Lein, and Xiaoquan Rao

#### **Table of Contents**

**Figure S1. Animal exposure protocol.** At the age of 28 days, 24 rats (12 male and 12 female) were randomly divided into two groups and exposed to traffic-related air pollution (TRAP) or filtered air (FA) continuously 24 hours a day, 7 days a week, for a total of 14 months in an exposure facility adjacent to a heavily trafficked tunnel in Northern California. Air was collected from the eastbound exit of the tunnel bores continuously without any modification for the TRAP group, while ambient air was drawn from outside near the facility and passed through filters to remove particles, activated charcoal to remove organic compounds and BaO to remove NO<sub>2</sub> before being delivered to the FA exposure chambers. Concentrations of PM<sub>2.5</sub> in µg/m<sup>3</sup> were determined in the 14 months of exposure and calculated using a gravimetric method by weighing the PM samplers pre- and post-exposure. Note: FA, filtered air; TRAP, traffic-related air pollution; PND, postnatal day.

**Figure S2. Carbon percent total PM<sub>2.5</sub> mass concentrations and mass concentration of PM<sub>2.5</sub>** Thermal optical reflectance determined elemental and organic carbon (EC/OC) analysis results for FA and TRAP. **Left Axis:** Carbon mass concentration of PM<sub>2.5</sub> in µg/m<sup>3</sup> **Right Axis:** Total concentration average percentage of PM<sub>2.5</sub>; error bars ± SEM (Filtered Air: FA, traffic-related air pollution: TRAP) Note: EC, elemental carbon, OC, organic carbon, OM, organic matter. N=10. Two-way analysis of variance (ANOVA) followed by Sidak's multiple comparisons test was used for statistical analysis. Mean ± SEM. The exact mean and SEM values for data presented in Figure S1 can be found in Table S12.

**Figure S3. Expression of fibrosis-related genes were examined in the lung tissues by qRT-PCR** Fold change of fibrosis-related genes in lungs from both female and male rats exposed to FA or TRAP. Note: FA, filtered air; TRAP, traffic-related air pollution; F, female; M, male. Mean  $\pm$  SEM; n=6; Two-way analysis of variance (ANOVA) followed by Sidak's multiple comparisons test was used for statistical analysis. \*P<0.05 compared to FA group in the same sex animals. The exact mean and SEM values for data presented in Figure S1 can be found in Table S13.

**Table S1. Elemental analysis including detection limit (DL) in the lung tissues after exposure.** Mean and SEM values in Figure 4 are also presented in this table.

**Table S2. List of genes analyzed, and their forward and reverse primers.**

**Table S3. Average daily PM<sub>2.5</sub> and TSP concentrations in FA and TRAP group.** Mean and SEM values are the ones presented in Figure 1A.

**Table S4.** 24-hour average concentrations of crustal elements and traffic related metals. Mean and SEM values are the ones presented in Figure 1B.

**Table S5. Comparison of body weight and normalized tissue weights in both female and male rats exposed to FA or TRAP.** Mean and SEM values are the ones presented in Figure 2.

**Table S6. Macroscopic view of black nodules in the lungs after chronic exposure.** Mean and SEM values are the ones presented in Figure 3.

**Table S7. Expression of oxidative stress and inflammation-related genes were examined in the lung tissues by qRT-PCR.** Mean and SEM values are the ones presented in Figure 5. All gene expressions were normalized by expression of housekeeping gene *beta-actin* and FA group was used as a reference group when calculating the  $\Delta\Delta C_t$  values. N=6. Two-way analysis of variance (ANOVA) followed by Sidak's multiple comparisons test was used for statistical analysis. \*P<0.05 compared to FA group in the same sex animals.

**Table S8. Expression of genes mediating oxidative stress, inflammation, fibrosis, and aging in female and male hearts of rats exposed to FA or TRAP.** Mean and SEM values are the ones presented in Figure 6. All gene expressions were normalized by expression of housekeeping gene *Hprt* and FA group was used as a reference group when calculating the  $\Delta\Delta C_t$  values. N=6. Two-way analysis of variance (ANOVA) followed by Sidak's multiple comparisons test was used for statistical analysis. \*P<0.05 compared to FA group in the same sex animals.

**Table S9.** Gömöri trichrome staining in hearts from rats exposed to FA or TRAP. Mean and SEM values are the ones presented in Figure 7.

**Table S10. Cytokines/chemokines were tested in the plasma of rats exposed to FA or TRAP by ELISA.** Concentration of cytokines in TRAP group were normalized by that in FA group to calculate the fold difference. Mean and SEM values are the ones presented in Figure 8A & 8B.

**Table S11. Macrophage and T cell markers were detected in the spleen of rats exposed to FA or TRAP by flow cytometry.** Mean and SEM values are the ones presented in Figure 8C & 8D & 8E.

**Table S12. Carbon percent total PM<sub>2.5</sub> mass concentrations and mass concentration of PM<sub>2.5</sub>.** Mean and SEM values are the ones presented in Figure S2.

**Table S13. Expression of fibrosis-related genes were examined in the lung tissues by qRT-PCR.** Mean and SEM values are the ones presented in Figure S3.

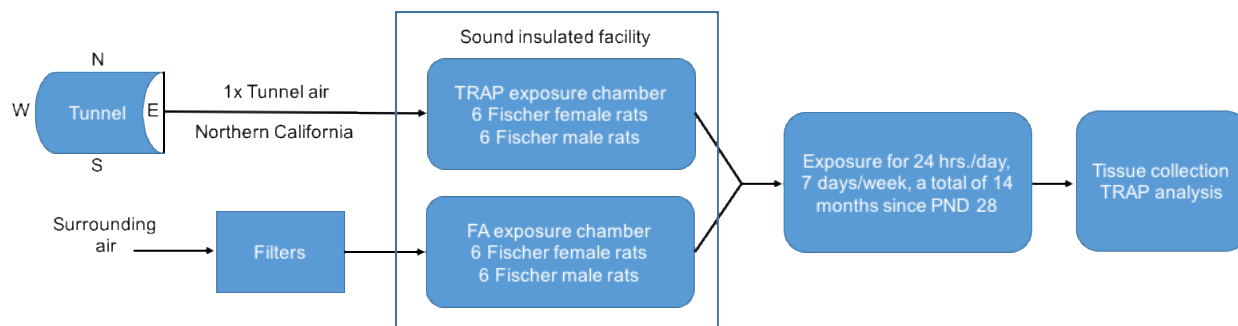

**Figure S1. Animal exposure protocol.** At the age of 28 days, 24 rats (12 male and 12 female) were randomly divided into two groups and exposed to traffic-related air pollution (TRAP) or filtered air (FA) continuously 24 hours a day, 7 days a week, for a total of 14 months in an exposure facility adjacent to a heavily trafficked tunnel in Northern California. Air was collected from the eastbound exit of the tunnel bores continuously without any modification for the TRAP group, while ambient air was drawn from outside near the facility and passed through filters to remove particles, activated charcoal to remove organic compounds and BaO to remove NO<sub>2</sub> before being delivered to the FA exposure chambers. Concentrations of PM<sub>2.5</sub> in µg/m<sup>3</sup> were determined in the 14 months of exposure and calculated using a gravimetric method by weighing the PM samplers pre- and post-exposure. Note: FA, filtered air; TRAP, traffic-related air pollution; PND, postnatal day.

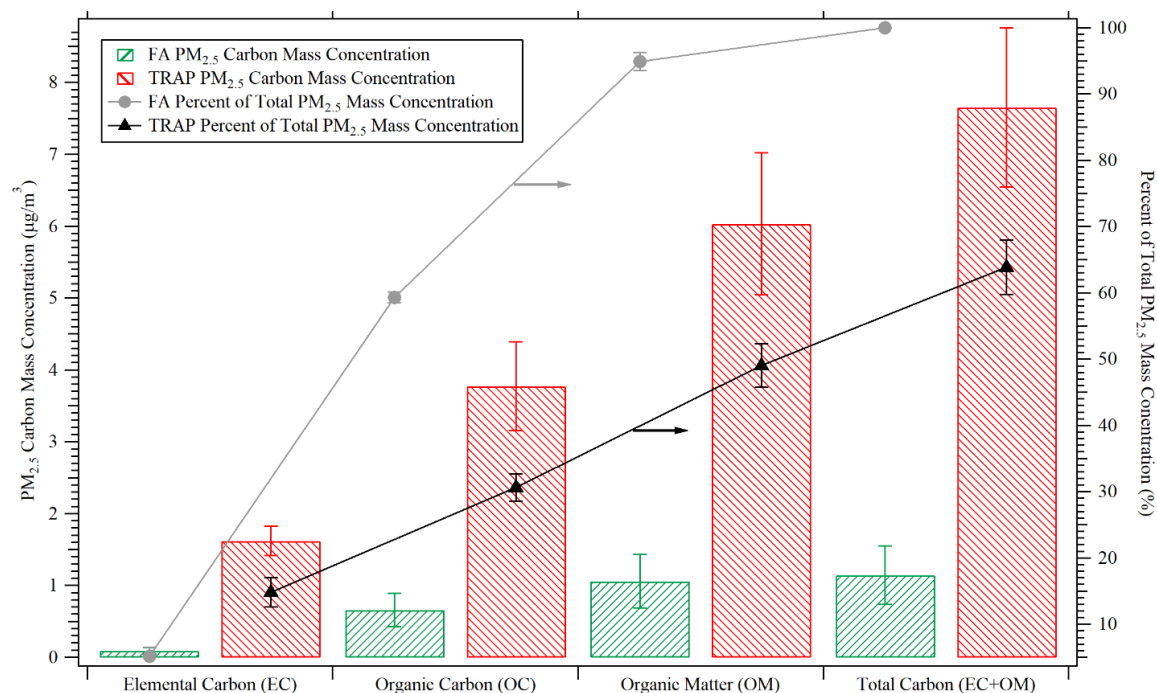

**Figure S2. Carbon percent total PM<sub>2.5</sub> mass concentrations and mass concentration of PM<sub>2.5</sub>**  
 Thermal optical reflectance determined elemental and organic carbon (EC/OC) analysis results for FA and TRAP. **Left Axis:** Carbon mass concentration of PM<sub>2.5</sub> in µg/m<sup>3</sup> **Right Axis:** Total concentration average percentage of PM<sub>2.5</sub>; error bars ± SEM (Filtered Air: FA, traffic-related air pollution: TRAP)  
 Note: EC, elemental carbon, OC, organic carbon, OM, organic matter. N=10. Two-way analysis of variance (ANOVA) followed by Sidak's multiple comparisons test was used for statistical analysis. Mean ± SEM. The exact mean and SEM values for data presented in Figure S1 can be found in Table S12.

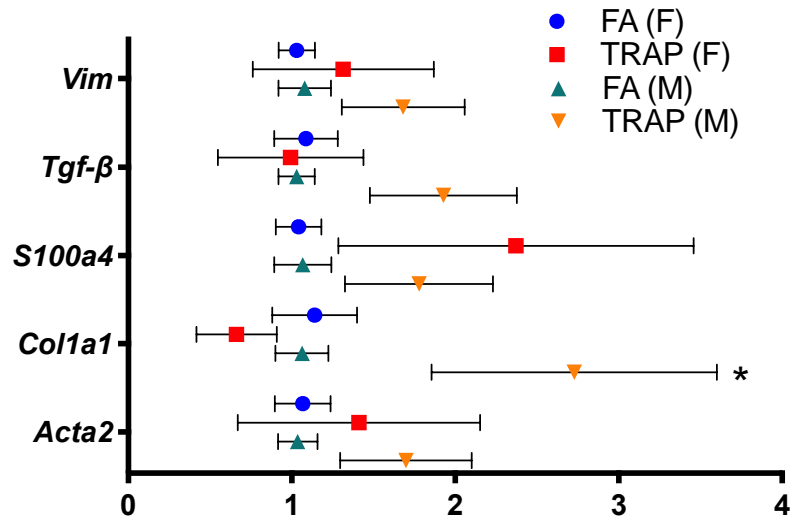

**Figure S3. Expression of fibrosis-related genes were examined in the lung tissues by qRT-PCR** Fold change of fibrosis-related genes in lungs from both female and male rats exposed to FA or TRAP. Note: FA, filtered air; TRAP, traffic-related air pollution; F, female; M, male. Mean  $\pm$  SEM; n=6; Two-way analysis of variance (ANOVA) followed by Sidak's multiple comparisons test was used for statistical analysis. \*P<0.05 compared to FA group in the same sex animals. The exact mean and SEM values for data presented in Figure S1 can be found in Table S13.

**Table S1. Elemental analysis including detection limit (DL) in the lung tissues after exposure.** Mean and SEM values in Figure 4 are also presented in this table.

|       | FA (F) ( $\mu\text{g/l}$ )                  | TRAP (F) ( $\mu\text{g/l}$ )                | FA (M) ( $\mu\text{g/l}$ )                  | TRAP (M) ( $\mu\text{g/l}$ )                | DL ( $\mu\text{g/l}$ ) |
|-------|---------------------------------------------|---------------------------------------------|---------------------------------------------|---------------------------------------------|------------------------|
| 7 Li  | UD                                          | UD                                          | UD                                          | UD                                          | 0.43                   |
| 9 Be  | UD                                          | UD                                          | UD                                          | UD                                          | 0.33                   |
| 11 B  | 413.39 $\pm$ 128.65                         | 364.58 $\pm$ 137.67                         | 263.58 $\pm$ 74.37                          | 286.49 $\pm$ 67.41                          | 0.92                   |
| 12 C  | 1.51e <sup>8</sup> $\pm$ 2.33e <sup>7</sup> | 1.98e <sup>8</sup> $\pm$ 8.82e <sup>6</sup> | 1.89e <sup>8</sup> $\pm$ 9.03e <sup>6</sup> | 1.79e <sup>8</sup> $\pm$ 1.03e <sup>7</sup> | 0.36                   |
| 14 N  | 1.93e <sup>9</sup> $\pm$ 2.87e <sup>8</sup> | 1.77e <sup>9</sup> $\pm$ 1.56e <sup>8</sup> | 1.30e <sup>9</sup> $\pm$ 8.93e <sup>7</sup> | 1.53e <sup>9</sup> $\pm$ 9.17e <sup>7</sup> | 1.4e <sup>7</sup>      |
| 23 Na | 1.08e <sup>6</sup> $\pm$ 1.63e <sup>5</sup> | 1.25e <sup>6</sup> $\pm$ 1.05e <sup>5</sup> | 1.12e <sup>6</sup> $\pm$ 3.68e <sup>4</sup> | 1.14e <sup>6</sup> $\pm$ 5.79e <sup>4</sup> | 6.40                   |
| 24 Mg | 8.34e <sup>4</sup> $\pm$ 9.88e <sup>3</sup> | 1.04e <sup>5</sup> $\pm$ 4.59e <sup>3</sup> | 9.10e <sup>4</sup> $\pm$ 2.90e <sup>3</sup> | 9.45e <sup>4</sup> $\pm$ 2.34e <sup>3</sup> | 4.50                   |
| 27 Al | 3.9e <sup>3</sup> $\pm$ 8.9e <sup>2</sup>   | 2.9e <sup>3</sup> $\pm$ 3.8e <sup>2</sup>   | 2.0e <sup>3</sup> $\pm$ 1.9e <sup>2</sup>   | 2.3e <sup>3</sup> $\pm$ 4.4e <sup>2</sup>   | 28.50                  |
| 28 Si | UD                                          | UD                                          | UD                                          | UD                                          | 0.0                    |
| 31 P  | 1.36e <sup>6</sup> $\pm$ 1.56e <sup>5</sup> | 1.75e <sup>6</sup> $\pm$ 3.36e <sup>4</sup> | 1.62e <sup>6</sup> $\pm$ 3.95e <sup>4</sup> | 1.62e <sup>6</sup> $\pm$ 6.14e <sup>5</sup> | 2.2                    |
| 34 S  | 4.88e <sup>5</sup> $\pm$ 6.52e <sup>4</sup> | 6.88e <sup>5</sup> $\pm$ 2.61e <sup>4</sup> | 5.89e <sup>5</sup> $\pm$ 3.06e <sup>4</sup> | 6.16e <sup>5</sup> $\pm$ 0.30e <sup>4</sup> | 0.0                    |
| 35 Cl | 1.10e <sup>6</sup> $\pm$ 1.32e <sup>5</sup> | 1.07e <sup>6</sup> $\pm$ 6.02e <sup>4</sup> | 1.12e <sup>6</sup> $\pm$ 8.07e <sup>4</sup> | 1.20e <sup>6</sup> $\pm$ 1.14e <sup>5</sup> | 0.0                    |
| 39 K  | 9.35e <sup>5</sup> $\pm$ 1.32e <sup>5</sup> | 1.08e <sup>6</sup> $\pm$ 6.96e <sup>4</sup> | 1.01e <sup>6</sup> $\pm$ 4.34e <sup>4</sup> | 1.05e <sup>6</sup> $\pm$ 5.46e <sup>4</sup> | 2.7                    |
| 43 Ca | 1.29e <sup>4</sup> $\pm$ 3.55e <sup>3</sup> | 1.23e <sup>4</sup> $\pm$ 3.39e <sup>3</sup> | 1.73e <sup>4</sup> $\pm$ 4.38e <sup>3</sup> | 1.54e <sup>4</sup> $\pm$ 3.26e <sup>3</sup> | 18                     |
| 45 Sc | 10.10 $\pm$ 2.08                            | 20.27 $\pm$ 4.98                            | 11.06 $\pm$ 2.83                            | 9.08 $\pm$ 2.17                             | 0.11                   |
| 47 Ti | 141.66 $\pm$ 41.23                          | 116.25 $\pm$ 25.56                          | 234.96 $\pm$ 67.57                          | 295.51 $\pm$ 58.86                          | 0.24                   |
| 51 V  | 9.60 $\pm$ 1.42                             | 7.15 $\pm$ 1.56                             | 7.05 $\pm$ 2.01                             | 5.83 $\pm$ 1.03                             | 0.04                   |
| 52 Cr | 55.45 $\pm$ 22.37                           | 269.35 $\pm$ 116.42                         | 26.10 $\pm$ 8.06                            | 21.81 $\pm$ 5.95                            | 0.30                   |
| 55 Mn | 167.35 $\pm$ 23.97                          | 190.78 $\pm$ 11.12                          | 213.36 $\pm$ 18.15                          | 193.71 $\pm$ 3.41                           | 0.11                   |
| 56 Fe | 6.43e <sup>4</sup> $\pm$ 1.02e <sup>3</sup> | 6.6                    |
| 59 Co | 18.31 $\pm$ 3.05                            | 16.14 $\pm$ 1.83                            | 21.83 $\pm$ 6.56                            | 16.11 $\pm$ 1.87                            | 0.02                   |
| 60 Ni | 7.03 $\pm$ 1.67                             | 84.38 $\pm$ 30.61                           | 12.84 $\pm$ 4.80                            | 41.49 $\pm$ 31.88                           | 0.01                   |
| 63 Cu | 1.00e <sup>3</sup> $\pm$ 1.46e <sup>2</sup> | 1.12e <sup>3</sup> $\pm$ 15.40              | 1.09e <sup>3</sup> $\pm$ 32.04              | 1.11e <sup>3</sup> $\pm$ 47.89              | 0.09                   |
| 66 Zn | 1.14e <sup>4</sup> $\pm$ 1.58e <sup>3</sup> | 1.37e <sup>4</sup> $\pm$ 3.72e <sup>2</sup> | 1.24e <sup>4</sup> $\pm$ 4.12e <sup>2</sup> | 1.22e <sup>4</sup> $\pm$ 2.35e <sup>2</sup> | 2.00                   |
| 69 Ga | 14.01 $\pm$ 4.66                            | 6.74 $\pm$ 1.00                             | 8.00 $\pm$ 2.16                             | 13.17 $\pm$ 1.96                            | 0.02                   |
| 72 Ge | UD                                          | UD                                          | UD                                          | UD                                          | 0.32                   |
| 75 As | 728.36 $\pm$ 180.83                         | 770.72 $\pm$ 166.12                         | 440.18 $\pm$ 80.57                          | 485.26 $\pm$ 71.50                          | 0.03                   |
| 78 Se | UD                                          | UD                                          | UD                                          | UD                                          | 0.32                   |
| 79 Br | 3.08e <sup>3</sup> $\pm$ 2.41e <sup>2</sup> | 3.79e <sup>3</sup> $\pm$ 1.95e <sup>2</sup> | 3.41e <sup>3</sup> $\pm$ 3.46e <sup>2</sup> | 3.65e <sup>3</sup> $\pm$ 3.31e <sup>2</sup> | 0.82                   |
| 85 Rb | 2.84e <sup>3</sup> $\pm$ 3.91e <sup>2</sup> | 3.39e <sup>3</sup> $\pm$ 9.38e <sup>1</sup> | 3.25e <sup>3</sup> $\pm$ 7.67e <sup>1</sup> | 3.25e <sup>3</sup> $\pm$ 1.26e <sup>2</sup> | 0.03                   |

|        |                                         |                                         |                                         |                                         |      |
|--------|-----------------------------------------|-----------------------------------------|-----------------------------------------|-----------------------------------------|------|
| 88 Sr  | 76.24 ± 13.15                           | 69.13 ± 10.31                           | 71.27 ± 11.17                           | 48.47 ± 4.84                            | 0.30 |
| 89 Y   | UD                                      | UD                                      | UD                                      | UD                                      | 0.01 |
| 90 Zr  | 7.23 ± 1.81                             | 5.53 ± 1.99                             | 4.86 ± 1.41                             | 8.75 ± 2.04                             | 0.06 |
| 93 Nb  | UD                                      | UD                                      | UD                                      | UD                                      | 0.01 |
| 95 Mo  | 98.95 ± 18.66                           | 118.37 ± 12.32                          | 141.51 ± 6.83                           | 139.71 ± 7.66                           | 0.08 |
| 107 Ag | UD                                      | UD                                      | UD                                      | UD                                      | 0.00 |
| 111 Cd | UD                                      | UD                                      | UD                                      | UD                                      | 0.02 |
| 115 In | 1.64e <sup>3</sup> ± 6.81e <sup>2</sup> | 2.06e <sup>3</sup> ± 3.60e <sup>2</sup> | 3.79e <sup>3</sup> ± 1.25e <sup>3</sup> | 4.06e <sup>3</sup> ± 1.08e <sup>3</sup> | 0.01 |
| 118 Sn | UD                                      | UD                                      | UD                                      | UD                                      | 0.12 |
| 121 Sb | 16.34 ± 6.32                            | 15.80 ± 3.52                            | 17.98 ± 1.56                            | 17.96 ± 3.80                            | 0.01 |
| 127 I  | 106.96 ± 23.44                          | 116.18 ± 18.41                          | 106.69 ± 14.87                          | 125.43 ± 11.37                          | 0.18 |
| 133 Cs | 13.31 ± 2.62                            | 9.79 ± 1.91                             | 16.13 ± 2.05                            | 12.87 ± 1.49                            | 0.01 |
| 137 Ba | 19.03 ± 5.16                            | 34.46 ± 9.82                            | 25.26 ± 6.21                            | 34.73 ± 13.27                           | 0.10 |
| 139 La | UD                                      | UD                                      | UD                                      | UD                                      | 0.01 |
| 140 Ce | 2.24 ± 0.83                             | 1.70 ± 0.58                             | 1.46 ± 0.42                             | 1.71 ± 0.39                             | 0.01 |
| 141 Pr | UD                                      | UD                                      | UD                                      | UD                                      | 0.01 |
| 146 Nd | UD                                      | UD                                      | UD                                      | UD                                      | 0.01 |
| 147 Sm | UD                                      | UD                                      | UD                                      | UD                                      | 0.01 |
| 153 Eu | UD                                      | UD                                      | UD                                      | UD                                      | 0.01 |
| 157 Gd | UD                                      | UD                                      | UD                                      | UD                                      | 0.01 |
| 159 Tb | 2.13 ± 0.33                             | 2.53 ± 0.58                             | 1.47 ± 0.22                             | 1.93 ± 0.42                             | 0.01 |
| 163 Dy | UD                                      | UD                                      | UD                                      | UD                                      | 0.01 |
| 165 Ho | UD                                      | UD                                      | UD                                      | UD                                      | 0.01 |
| 166 Er | UD                                      | UD                                      | UD                                      | UD                                      | 0.01 |
| 169 Tm | UD                                      | UD                                      | UD                                      | UD                                      | 0.01 |
| 172 Yb | UD                                      | UD                                      | UD                                      | UD                                      | 0.01 |
| 175 Lu | 2.81 ± 0.94                             | 1.32 ± 0.24                             | 2.08 ± 0.36                             | 1.65 ± 0.36                             | 0.01 |
| 178 Hf | 7.27 ± 2.12                             | 3.27 ± 1.08                             | 4.93 ± 1.66                             | 7.07 ± 2.41                             | 0.38 |
| 181 Ta | UD                                      | UD                                      | UD                                      | UD                                      | 0.01 |

---



|        |             |             |             |             |      |
|--------|-------------|-------------|-------------|-------------|------|
| 182 W  | UD          | UD          | UD          | UD          | 0.01 |
| 185 Re | UD          | UD          | UD          | UD          | 0.01 |
| 208 Pb | 4.26 ± 1.38 | 2.00 ± 0.45 | 2.89 ± 0.74 | 1.42 ± 0.33 | 0.01 |
| 209 Bi | UD          | UD          | UD          | UD          | 0.01 |
| 232 Th | 4.69 ± 1.67 | 1.44 ± 0.39 | 1.56 ± 0.42 | 1.93 ± 0.38 | 0.13 |
| 238 U  | UD          | UD          | UD          | UD          | 0.01 |

---

DL: detection limit; UD: undetected; FA, filtered air; TRAP, traffic-related air pollution; F, female; M, male

**Table S2. List of genes analyzed, and their forward and reverse primers.**

| <b>Gene</b>                    | <b>Forward Sequence (5'-3')</b> | <b>Reverse Sequence (3'-5')</b> |
|--------------------------------|---------------------------------|---------------------------------|
| <i>Sod2</i>                    | GGACAAACCTGAGCCCTAAG            | CAAAGACCCAAAGTCACGC             |
| <i>Gpx</i>                     | AATCAGTTCGGACATCAGGAG           | GAAGGTAAAGAGCGGGTGAG            |
| <i>Sod1</i>                    | TGTGTCCATTGAAGATCGTGTG          | CTCCAGCATTTCAGTCTTTG            |
| <i>Gsr</i>                     | TGTGAAAATCTACTCGACCGC           | ATCTCATCGCAGCCAATCC             |
| <i>G6pd</i>                    | ACATCCGCAAACAGAGTGAG            | CTGTTGAGGTGCTTGTAGGAG           |
| <i>Ho-1</i>                    | CTTTCAGAAGGGTCAGGTGTC           | TGCTTGTTCGCTCTATCTCC            |
| <i>Nrf2</i>                    | GCTATTTTCCATTCCCAGATTAC         | ATTGCTGTCCATCTCTGTGTCAG         |
| <i>Nos2</i>                    | GGAGCAGGTTGAGGATTACTTC          | TCAGAGTCTTGTGCCTTTGG            |
| <i>TNF-<math>\alpha</math></i> | CTTCTCATTCCCTGCTCGTGG           | TGATCTGAGTGTGAGGGTCTG           |
| <i>Il-6</i>                    | AAGCCAGAGTCATTTCAGAGC           | GTCCTTAGCCACTCCTTCTG            |
| <i>IFN-<math>\gamma</math></i> | CCAAGGCACACTCATTGAAAG           | TCTGGCTCTCAAGTATTTTCGTG         |
| <i>Mcp-1</i>                   | GGTCTCTGTACGCTTCTG              | TTCTCCAGCCGACTCATTG             |
| <i>TGF-<math>\beta</math></i>  | CCTGAGTGGCTGTCTTTTGA            | CGTGGAGTACATTATCTTTGCTG         |
| <i>IL-1<math>\beta</math></i>  | TGCAGGCTTCGAGATGAAC             | GGGATTTTGTGCTTGCTTGTG           |
| <i>Nlrp3</i>                   | GACCTCAACAGACGCTACAC            | AGTTCATGCTCCCTTTCCTG            |
| <i>Tlr4</i>                    | CATGACATCCCTTATTCAACCAAG        | GCCATGCCTTGTCTTCAATTG           |
| <i>Tlr9</i>                    | GCTGTCCTATAACCTCATCGTC          | ACCCACATCAAGCACTCG              |
| <i>Acta2</i>                   | GTGAAGAGGAAGACAGCACAG           | ATTCCAACCATCACTCCCTG            |
| <i>Col1a1</i>                  | AGCATGTCTGGTTTGGAGAG            | GTGATAGGTGATGTTCTGGGAG          |
| <i>S100a4</i>                  | TCCACCTTCCACAAATACTCAG          | CAGCTTCGTCTGTCCTTCTC            |
| <i>Vim</i>                     | CATTGAGATCGCCACCTACAG           | AGGAGTGTTCTTTTGGAGTGG           |
| <i>Myh6</i>                    | CTTCTCCACCTATGCTTCTGC           | CAGCTTGTTTCAGATTTTCCCG          |
| <i>Myh7</i>                    | ACAACCCCTACGATTATGCG            | CGCCTGTCAGCTTGTAATG             |
| <i>Atp2a2</i>                  | TTTGGGCAGGATGAGGATG             | TTGTGGGAAGGTTCAACTCG            |
| <i>Adcy5</i>                   | ATGAAGAGGATGGGCTTTGAG           | AAGAGGAACTTTCGGACGTG            |
| <i>Erc1</i>                    | GACTCCTGATTATGTGCTGGG           | CCGTTTCATGGATGTAGTCTGG          |
| <i>Igf1r</i>                   | AACCCCGAGTATTTTCAGCG            | GCCACTCCTTCATAGACCATC           |
| <i>Hprt1</i>                   | GGTGAAAAGGACCTCTCGAAG           | GCTTTTCCACTTTCGCTGATG           |
| <i>Act-b</i>                   | CACTTTCTACAATGAGCTGCG           | CTGGATGGCTACGTACATGG            |

**Table S3. Average daily PM<sub>2.5</sub> and TSP concentrations in FA and TRAP group.** Mean and SEM values are the ones presented in Figure 1A.

| Day       | FA PM <sub>2.5</sub> (µg/m <sup>3</sup> ) | FA TSP (µg/m <sup>3</sup> ) | TRAP PM <sub>2.5</sub> (µg/m <sup>3</sup> ) | TRAP TSP (µg/m <sup>3</sup> ) |
|-----------|-------------------------------------------|-----------------------------|---------------------------------------------|-------------------------------|
| Sunday    | 0.66 ± 0.37                               | 0.89 ± 0.35                 | 6.95 ± 0.94                                 | 11.49 ± 0.85                  |
| Monday    | 0.37 ± 0.22                               | 0.54 ± 0.18                 | 5.08 ± 0.27                                 | 9.00 ± 0.66                   |
| Tuesday   | 0.56 ± 0.24                               | 0.64 ± 0.19                 | 7.57 ± 1.01                                 | 12.26 ± 2.33                  |
| Wednesday | 0.32 ± 0.14                               | 0.50 ± 0.22                 | 7.55 ± 1.17                                 | 12.34 ± 1.94                  |
| Thursday  | 0.26 ± 0.09                               | 1.73 ± 0.74                 | 9.87 ± 2.58                                 | 14.90 ± 2.63                  |
| Friday    | 0.42 ± 0.17                               | 1.11 ± 0.55                 | 8.21 ± 1.87                                 | 13.19 ± 2.54                  |
| Saturday  | 0.34 ± 0.09                               | 1.30 ± 0.75                 | 8.07 ± 1.46                                 | 12.38 ± 1.57                  |

FA, filtered air; TRAP, traffic-related air pollution; PM, particulate matter; TSP, total suspended particle

**Table S4. 24-hour average concentrations of crustal elements and traffic related metals.** Mean and SEM values are the ones presented in Figure 1B.

| Element                                                        | FA PM <sub>2.5</sub> Mass Fraction | TRAP PM <sub>2.5</sub> Mass Fraction | FA PM <sub>2.5</sub> Concentration (µg/m <sup>3</sup> ) | TRAP PM <sub>2.5</sub> Concentration (µg/m <sup>3</sup> ) |
|----------------------------------------------------------------|------------------------------------|--------------------------------------|---------------------------------------------------------|-----------------------------------------------------------|
| CRUSTAL ELEMENTS (soil derived minerals/clay forming minerals) |                                    |                                      |                                                         |                                                           |
| Na                                                             | 5.72E-3 ± 3.06E-3                  | 2.48E-2 ± 8.25E-03                   | 5.88E-3 ± 4.05E-3                                       | 2.36E-1 ± 7.03E-2                                         |
| Mg                                                             | 1.14E-2 ± 7.86E-3                  | 4.23E-3 ± 1.13E-03                   | 1.25E-3 ± 4.66E-4                                       | 4.26E-2 ± 1.14E-2                                         |
| Al                                                             | 5.80E-3 ± 3.18E-3                  | 3.93E-3 ± 8.81E-4                    | 1.07E-3 ± 2.48E-3                                       | 3.87E-2 ± 7.21E-3                                         |
| Si                                                             | 6.67E-3 ± 3.30E-3                  | 7.19E-3 ± 2.26E-3                    | 1.58E-3 ± 5.00E-4                                       | 6.72E-2 ± 1.52E-2                                         |
| P                                                              | 4.36E-5 ± 3.35E-5                  | 3.43E-4 ± 8.95E-5                    | 4.81E-5 ± 3.84E-5                                       | 3.39E-3 ± 6.04E-4                                         |
| S                                                              | 2.46E-2 ± 2.74E-3                  | 2.95E-2 ± 3.75E-3                    | 2.55E-2 ± 8.81E-3                                       | 3.25E-1 ± 3.28E-2                                         |
| Cl                                                             | 2.90E-3 ± 2.04E-3                  | 8.34E-3 ± 6.68E-3                    | 3.46E-3 ± 3.33E-3                                       | 8.10E-2 ± 6.49E-2                                         |
| K                                                              | 6.34E-3 ± 1.70E-3                  | 6.99E-3 ± 1.05E-3                    | 6.56E-3 ± 2.54E-3                                       | 7.92E-2 ± 1.25E-2                                         |
| Ca                                                             | 2.17E-3 ± 1.48E-3                  | 4.36E-3 ± 7.88E-4                    | 6.96E-4 ± 2.55E-4                                       | 4.34E-2 ± 4.48E-3                                         |
| Fe                                                             | 1.22E-2 ± 7.92E-3                  | 1.71E-2 ± 3.64E-3                    | 2.83E-3 ± 7.41E-4                                       | 1.73E-1 ± 1.95E-2                                         |
| Ba                                                             | 9.60E-3 ± 6.49E-3                  | 2.29E-3 ± 5.44E-4                    | 1.46E-3 ± 4.66E-4                                       | 2.30E-2 ± 3.09E-3                                         |
| TRAFFIC RELATED METALS (brake wear/tire wear/asphalt)          |                                    |                                      |                                                         |                                                           |
| Ti                                                             | 6.36E-4 ± 3.98E-4                  | 1.12E-3 ± 2.37E-4                    | 1.96E-4 ± 5.67E-5                                       | 1.13E-2 ± 1.26E-3                                         |
| Cr                                                             | 5.64E-4 ± 3.84E-4                  | 6.89E-5 ± 1.43E-5                    | 6.29E-5 ± 1.71E-5                                       | 6.83E-4 ± 6.75E-5                                         |
| Mn                                                             | 5.83E-4 ± 3.17E-4                  | 2.09E-4 ± 4.11E-5                    | 1.13E-4 ± 4.84E-5                                       | 2.12E-3 ± 2.28E-4                                         |
| Cu                                                             | 9.44E-4 ± 4.57E-4                  | 1.33E-3 ± 2.57E-4                    | 1.84E-4 ± 4.46E-5                                       | 1.36E-2 ± 1.28E-3                                         |
| Zn                                                             | 1.38E-3 ± 7.23E-3                  | 9.85E-4 ± 2.86E-4                    | 3.24E-4 ± 1.10E-4                                       | 9.53E-3 ± 1.54E-3                                         |
| Br                                                             | 4.42E-4 ± 3.93E-4                  | 2.57E-4 ± 3.18E-5                    | 1.12E-4 ± 4.68E-5                                       | 2.80E-3 ± 2.87E-4                                         |
| Sr                                                             | 9.92E-5 ± 5.22E-5                  | 2.59E-4 ± 1.25E-4                    | 7.42E-5 ± 4.41E-5                                       | 2.90E-3 ± 1.63E-3                                         |
| Zr                                                             | 6.02E-4 ± 2.45E-4                  | 5.49E-4 ± 1.38E-4                    | 3.72E-4 ± 1.53E-4                                       | 5.27E-3 ± 7.13E-4                                         |
| Cd                                                             | 3.21E-4 ± 2.02E-4                  | 4.03E-5 ± 1.94E-5                    | 7.24E-5 ± 3.61E-5                                       | 5.76E-4 ± 2.71E-4                                         |
| Sn                                                             | 1.39E-3 ± 8.25E-4                  | 2.50E-4 ± 4.73E-5                    | 3.35E-4 ± 1.25E-4                                       | 2.70E-3 ± 3.83E-4                                         |
| Sb                                                             | 1.15E-3 ± 9.16E-4                  | 1.70E-4 ± 7.43E-5                    | 1.94E-4 ± 1.11E-4                                       | 1.56E-3 ± 4.79E-4                                         |
| Ce                                                             | 6.52E-4 ± 4.45E-4                  | 1.05E-4 ± 5.80E-5                    | 2.01E-4 ± 1.27E-4                                       | 7.92E-4 ± 3.64E-4                                         |
| Pb                                                             | 1.72E-4 ± 1.03E-4                  | 7.92E-5 ± 2.01E-5                    | 8.55E-5 ± 3.78E-5                                       | 7.38E-4 ± 1.43E-4                                         |

FA, filtered air; TRAP, traffic-related air pollution; PM, particulate matter

**Table S5. Comparison of body weight and normalized tissue weights in both female and male rats exposed to FA or TRAP.** Mean and SEM values are the ones presented in Figure 2.

|                       | <b>FA (F)</b> | <b>TRAP (F)</b> | <b>FA (M)</b>  | <b>TRAP (M)</b> |
|-----------------------|---------------|-----------------|----------------|-----------------|
| Body weight (g)       | 258.67 ± 5.44 | 273.33 ± 5.89   | 463.50 ± 13.00 | 501.00 ± 12.30  |
| Lung: % body weight   | 0.36 ± 0.02   | 0.36 ± 0.02     | 0.29 ± 0.01    | 0.30 ± 0.01     |
| Heart: % body weight  | 0.29 ± 0.01   | 0.30 ± 0.01     | 0.26 ± 0.01    | 0.25 ± 0.01     |
| Spleen: % body weight | 0.18 ± 0.01   | 0.17 ± 0.01     | 0.20 ± 0.01    | 0.23 ± 0.02     |

FA, filtered air; TRAP, traffic-related air pollution; F, female; M, male

**Table S6. Macroscopic view of black nodules in the lungs after chronic exposure.** Mean and SEM values are the ones presented in Figure 3.

|                          | <b>FA (F)</b> | <b>TRAP (F)</b> | <b>FA (M)</b> | <b>TRAP (M)</b> |
|--------------------------|---------------|-----------------|---------------|-----------------|
| area of nodules/lung (%) | 0.03 ± 0.01   | 0.52 ± 0.04     | 0.02 ± 0.01   | 0.48 ± 0.11     |

FA, filtered air; TRAP, traffic-related air pollution; F, female; M, male

**Table S7. Expression of oxidative stress and inflammation-related genes were examined in the lung tissues by qRT-PCR.** Mean and SEM values are the ones presented in Figure 5. All gene expressions were normalized by expression of housekeeping gene *beta-actin* and FA group was used as a reference group when calculating the  $\Delta\Delta C_t$  values. N=6. Two-way analysis of variance (ANOVA) followed by Sidak's multiple comparisons test was used for statistical analysis. \*P<0.05 compared to FA group in the same sex animals.

| Gene         | Full Name                                   | FA (F)      | TRAP (F)    | P     | FA (M)      | TRAP (M)    | P     |
|--------------|---------------------------------------------|-------------|-------------|-------|-------------|-------------|-------|
| <i>G6pd</i>  | Glucose 6-phosphate dehydrogenase           | 1.06 ± 0.14 | 1.05 ± 0.12 | 0.96  | 1.04 ± 0.12 | 1.12 ± 0.08 | 0.63  |
| <i>Gpx1</i>  | Glutathione peroxidase                      | 1.04 ± 0.12 | 0.88 ± 0.1  | 0.32  | 1.04 ± 0.13 | 1.16 ± 0.08 | 0.46  |
| <i>Gsr</i>   | Glutathione reductase                       | 1.01 ± 0.07 | 0.99 ± 0.07 | 0.79  | 1.03 ± 0.12 | 1.14 ± 0.08 | 0.49  |
| <i>Ho-1</i>  | Heme oxygenase I                            | 1.04 ± 0.12 | 0.94 ± 0.04 | 0.43  | 1.05 ± 0.25 | 1.59 ± 0.19 | 0.04* |
| <i>Nos2</i>  | Nitric oxide synthases 2                    | 1.02 ± 0.08 | 1.04 ± 0.11 | 0.93  | 1.0 ± 0.14  | 1.07 ± 0.14 | 0.73  |
| <i>Nrf2</i>  | Nuclear factor erythroid 2-related factor 2 | 1.02 ± 0.08 | 0.82 ± 0.04 | 0.04* | 1.0 ± 0.08  | 1.05 ± 0.09 | 0.69  |
| <i>Sod1</i>  | Superoxide dismutase 1                      | 1.12 ± 0.2  | 0.84 ± 0.14 | 0.28  | 0.96 ± 0.31 | 1.09 ± 0.2  | 0.70  |
| <i>Sod2</i>  | Superoxide dismutase 2                      | 1.04 ± 0.12 | 0.70 ± 0.08 | 0.04* | 1.10 ± 0.22 | 1.09 ± 0.13 | 0.97  |
| <i>Ifn-γ</i> | Interferon gamma                            | 1.07 ± 0.16 | 1.21 ± 0.12 | 0.48  | 1.0 ± 0.20  | 0.74 ± 0.15 | 0.33  |
| <i>Il-1β</i> | Interleukin 1 beta                          | 1.18 ± 0.37 | 2.06 ± 0.6  | 0.26  | 1.0 ± 0.14  | 0.68 ± 0.17 | 0.71  |
| <i>Il-6</i>  | Interleukin 6                               | 1.15 ± 0.31 | 1.58 ± 0.30 | 0.34  | 1.0 ± 0.20  | 0.69 ± 0.08 | 0.18  |
| <i>Mcp-1</i> | Monocyte chemoattractant protein-1          | 1.16 ± 0.28 | 0.87 ± 0.09 | 0.35  | 1.05 ± 0.15 | 0.93 ± 0.09 | 0.97  |
| <i>Nlrp3</i> | NLR family pyrin domain containing 3        | 1.02 ± 0.07 | 0.99 ± 0.08 | 0.83  | 1.25 ± 0.38 | 1.23 ± 0.25 | 0.99  |
| <i>Tlr4</i>  | Toll-like receptor 4                        | 1.01 ± 0.07 | 0.97 ± 0.07 | 0.66  | 1.02 ± 0.09 | 0.94 ± 0.10 | 0.99  |
| <i>Tlr9</i>  | Toll-like receptor 9                        | 1.01 ± 0.07 | 1.30 ± 0.11 | 0.06  | 1.15 ± 0.29 | 1.65 ± 0.29 | 0.33  |
| <i>Tnf-α</i> | Tumor necrosis factor alpha                 | 1.03 ± 0.1  | 0.97 ± 0.12 | 0.73  | 1.0 ± 0.07  | 1.07 ± 0.16 | 0.71  |

FA, filtered air; TRAP, traffic-related air pollution; F, female; M, male

**Table S8. Expression of genes mediating oxidative stress, inflammation, fibrosis, and aging in female and male hearts of rats exposed to FA or TRAP.** Mean and SEM values are the ones presented in Figure 6. All gene expressions were normalized by expression of housekeeping gene *Hprt* and FA group was used as a reference group when calculating the  $\Delta\Delta\text{Ct}$  values. N=6. Two-way analysis of variance (ANOVA) followed by Sidak's multiple comparisons test was used for statistical analysis. \*P<0.05 compared to FA group in the same sex animals.

| Gene          | Full Name                                     | FA (F)      | TRAP (F)    | P      | FA (M)      | TRAP (M)    | P     |
|---------------|-----------------------------------------------|-------------|-------------|--------|-------------|-------------|-------|
| <i>G6pd</i>   | Glucose 6-phosphate dehydrogenase             | 1.00 ± 0.22 | 1.56 ± 0.26 | 0.12   | 1.00 ± 0.20 | 1.03 ± 0.16 | 0.91  |
| <i>Gpx1</i>   | Glutathione peroxidase                        | 1.00 ± 0.19 | 0.75 ± 0.18 | 0.36   | 1.04 ± 0.14 | 1.41 ± 0.19 | 0.14  |
| <i>Gsr</i>    | Glutathione reductase                         | 1.00 ± 0.08 | 1.25 ± 0.05 | 0.02*  | 1.01 ± 0.07 | 1.14 ± 0.05 | 0.18  |
| <i>Ho-1</i>   | Heme oxygenase I                              | 1.00 ± 0.25 | 0.97 ± 0.17 | 0.40   | 1.03 ± 0.12 | 1.57 ± 0.15 | 0.02* |
| <i>Nos2</i>   | Nitric oxide synthases 2                      | 1.00 ± 0.31 | 1.32 ± 0.26 | 0.52   | 1.07 ± 0.17 | 1.02 ± 0.21 | 0.86  |
| <i>Nrf2</i>   | Nuclear factor erythroid 2-related factor 2   | 1.00 ± 0.11 | 1.33 ± 0.12 | 0.07   | 1.02 ± 0.09 | 1.17 ± 0.09 | 0.27  |
| <i>Sod1</i>   | Superoxide dismutase 1                        | 1.00 ± 0.10 | 0.89 ± 0.07 | 0.24   | 1.09 ± 0.20 | 1.15 ± 0.24 | 0.84  |
| <i>Sod2</i>   | Superoxide dismutase 2                        | 1.00 ± 0.09 | 0.94 ± 0.03 | 0.28   | 1.01 ± 0.06 | 1.04 ± 0.10 | 0.76  |
| <i>Ifn-γ</i>  | Interferon gamma                              | 1.00 ± 0.14 | 2.13 ± 0.28 | 0.01*  | 1.02 ± 0.08 | 1.62 ± 0.24 | 0.04* |
| <i>Il-1β</i>  | Interleukin 1 beta                            | 1.00 ± 0.34 | 0.86 ± 0.14 | 0.71   | 1.05 ± 0.15 | 1.50 ± 0.36 | 0.28  |
| <i>Il-6</i>   | Interleukin 6                                 | 1.00 ± 0.21 | 2.26 ± 0.33 | 0.01*  | 0.93 ± 0.21 | 1.42 ± 0.09 | 0.06  |
| <i>Mcp-1</i>  | Monocyte chemoattractant protein-1            | 1.00 ± 0.11 | 1.55 ± 0.28 | 0.09   | 1.08 ± 0.18 | 1.93 ± 0.44 | 0.08  |
| <i>Nlrp3</i>  | NLR family pyrin domain containing 3          | 1.00 ± 0.26 | 2.33 ± 0.51 | 0.04*  | 1.06 ± 0.16 | 1.88 ± 0.26 | 0.04* |
| <i>Tlr4</i>   | Toll-like receptor 4                          | 1.00 ± 0.21 | 1.80 ± 0.21 | 0.02*  | 1.01 ± 0.05 | 1.33 ± 0.12 | 0.03* |
| <i>Tlr9</i>   | Toll-like receptor 9                          | 1.00 ± 0.31 | 1.38 ± 0.22 | 0.33   | 1.10 ± 0.21 | 1.55 ± 0.25 | 0.20  |
| <i>Tnf-α</i>  | Tumor necrosis factor alpha                   | 1.00 ± 0.17 | 1.79 ± 0.23 | <0.01* | 1.02 ± 0.10 | 1.52 ± 0.25 | 0.09  |
| <i>Acta2</i>  | Smooth muscle aortic alpha-actin              | 1.00 ± 0.24 | 1.99 ± 0.21 | <0.01* | 1.00 ± 0.14 | 1.31 ± 0.33 | 0.63  |
| <i>Colla1</i> | Collagen, type I, alpha 1                     | 1.00 ± 0.20 | 1.92 ± 0.32 | 0.03*  | 1.08 ± 0.17 | 1.01 ± 0.15 | 0.99  |
| <i>S100a4</i> | S100 calcium-binding protein a4               | 1.00 ± 0.19 | 1.85 ± 0.32 | 0.04*  | 1.02 ± 0.08 | 1.19 ± 0.19 | 0.94  |
| <i>Tgf-β</i>  | Transforming growth factor-beta               | 1.00 ± 0.09 | 1.68 ± 0.22 | 0.01*  | 1.03 ± 0.11 | 1.18 ± 0.10 | 0.31  |
| <i>Vim</i>    | Type III intermediate filament protein        | 1.00 ± 0.16 | 1.57 ± 0.21 | 0.06   | 1.04 ± 0.12 | 1.11 ± 0.06 | 0.99  |
| <i>Adcy5</i>  | Adenylate cyclase 5                           | 1.00 ± 0.12 | 0.99 ± 0.08 | 0.95   | 1.01 ± 0.05 | 1.33 ± 0.17 | 0.09  |
| <i>Atp2a2</i> | Sarcoplasmic/endoplasmic reticulum calcium    | 1.00 ± 0.04 | 1.14 ± 0.10 | 0.20   | 1.00 ± 0.04 | 1.14 ± 0.10 | 0.24  |
| <i>Ercc1</i>  | Excision repair cross-complementation group 1 | 1.08 ± 0.19 | 1.63 ± 0.16 | <0.01* | 1.08 ± 0.15 | 1.01 ± 0.11 | 0.74  |
| <i>Igf1r</i>  | Insulin-like growth factor-1                  | 1.00 ± 0.15 | 1.46 ± 0.13 | 0.04*  | 1.05 ± 0.12 | 1.17 ± 0.09 | 0.44  |
| <i>Myh6</i>   | Myosin heavy chain, alpha isoform             | 1.00 ± 0.12 | 1.10 ± 0.06 | 0.38   | 1.01 ± 0.06 | 1.38 ± 0.17 | 0.03* |
| <i>Myh7</i>   | Myosin heavy chain, beta isoform              | 1.04 ± 0.10 | 0.76 ± 0.03 | 0.06   | 1.01 ± 0.07 | 1.00 ± 0.08 | 0.86  |

FA, filtered air; TRAP, traffic-related air pollution; F, female; M, male

**Table S9. Gömöri trichrome staining in hearts from rats exposed to FA or TRAP.** Mean and SEM values are the ones presented in Figure 7.

|                            | FA (F)      | TRAP (F)     | FA (M)       | TRAP (M)    |
|----------------------------|-------------|--------------|--------------|-------------|
| Collagen positive area (%) | 8.26 ± 0.59 | 14.27 ± 1.36 | 10.59 ± 0.81 | 9.66 ± 0.62 |

FA, filtered air; TRAP, traffic-related air pollution; F, female; M, male

**Table S10. Cytokines/chemokines were tested in the plasma of rats exposed to FA or TRAP by ELISA.** Concentration of cytokines in TRAP group were normalized by that in FA group to calculate the fold difference. Mean and SEM values are the ones presented in Figure 8A & 8B.

|               | FA (F)      | TRAP (F)    | FA (M)      | TRAP (M)    |
|---------------|-------------|-------------|-------------|-------------|
| IL-1 $\alpha$ | 1.00 ± 0.03 | 1.33 ± 0.17 | 1.00 ± 0.17 | 0.76 ± 0.11 |
| IL-1 $\beta$  | 1.00 ± 0.03 | 0.92 ± 0.04 | 1.00 ± 0.02 | 1.23 ± 0.10 |
| IL-2          | 1.00 ± 0.05 | 0.92 ± 0.04 | 1.00 ± 0.09 | 0.93 ± 0.02 |
| IL-4          | 1.00 ± 0.04 | 0.95 ± 0.09 | 1.00 ± 0.06 | 1.38 ± 0.32 |
| IL-6          | 1.00 ± 0.05 | 1.08 ± 0.10 | 1.00 ± 0.05 | 1.27 ± 0.23 |
| IL-10         | 1.00 ± 0.04 | 0.94 ± 0.08 | 1.00 ± 0.05 | 0.88 ± 0.03 |
| IL-12         | 1.00 ± 0.03 | 0.96 ± 0.03 | 1.00 ± 0.06 | 0.94 ± 0.08 |
| IL-13         | 1.00 ± 0.02 | 0.96 ± 0.03 | 1.00 ± 0.05 | 1.11 ± 0.05 |
| IFN- $\gamma$ | 1.00 ± 0.13 | 1.25 ± 0.05 | 1.00 ± 0.04 | 1.16 ± 0.15 |
| TNF $\alpha$  | 1.00 ± 0.04 | 1.13 ± 0.05 | 1.00 ± 0.12 | 0.85 ± 0.07 |
| GM-CSF        | 1.00 ± 0.03 | 1.03 ± 0.04 | 1.00 ± 0.06 | 1.05 ± 0.22 |
| Rantes        | 1.00 ± 0.01 | 0.97 ± 0.02 | 1.00 ± 0.12 | 0.81 ± 0.25 |

FA, filtered air; TRAP, traffic-related air pollution; F, female; M, male

**Table S11. Macrophage and T cell markers were detected in the spleen of rats exposed to FA or TRAP by flow cytometry.** Mean and SEM values are the ones presented in Figure 8C & 8D & 8E.

|                             | FA (F)       | TRAP (F)     | FA (M)       | TRAP (M)     |
|-----------------------------|--------------|--------------|--------------|--------------|
| M1/total macrophages (%)    | 12.77 ± 1.37 | 11.34 ± 0.79 | 13.60 ± 0.78 | 16.11 ± 0.65 |
| M2/total macrophages (%)    | 5.395 ± 0.54 | 6.20 ± 0.49  | 10.24 ± 1.88 | 5.28 ± 0.66  |
| Activated/total T cells (%) | 71.74 ± 3.97 | 69.62 ± 3.19 | 69.65 ± 1.96 | 69.12 ± 1.60 |

FA, filtered air; TRAP, traffic-related air pollution; F, female; M, male

**Table S12. Carbon percent total PM<sub>2.5</sub> mass concentrations and mass concentration of PM<sub>2.5</sub>.** Mean and SEM values are the ones presented in Figure S2.

|       | FA                                     |                              | TRAP                                   |                              |
|-------|----------------------------------------|------------------------------|----------------------------------------|------------------------------|
|       | PM <sub>2.5</sub> (µg/m <sup>3</sup> ) | % of total PM <sub>2.5</sub> | PM <sub>2.5</sub> (µg/m <sup>3</sup> ) | % of total PM <sub>2.5</sub> |
| EC    | 0.09 ± 0.04                            | 5.13 ± 1.36                  | 1.62 ± 0.20                            | 14.84 ± 2.17                 |
| OC    | 0.66 ± 0.23                            | 59.29 ± 0.85                 | 3.77 ± 0.62                            | 30.64 ± 2.06                 |
| OM    | 1.06 ± 0.37                            | 94.87 ± 1.36                 | 6.03 ± 0.99                            | 49.02 ± 3.29                 |
| EC+OC | 0.75 ± 0.27                            | 64.42 ± 0.51                 | 5.39 ± 0.75                            | 45.47 ± 3.11                 |
| EC+OM | 1.14 ± 0.41                            | 100 ± 0.38                   | 7.65 ± 1.11                            | 63.86 ± 4.08                 |

EC, elemental carbon; OC, organic carbon; OM, organic matter; FA, filtered air; TRAP, traffic-related air pollution; F, female; M, male

**Table S13. Expression of fibrosis-related genes were examined in the lung tissues by qRT-PCR.** Mean and SEM values are the ones presented in Figure S3.

| Gene          | Full Name                              | FA (F)      | TRAP (F)    | FA (M)      | TRAP (M)    |
|---------------|----------------------------------------|-------------|-------------|-------------|-------------|
| <i>Acta2</i>  | Smooth muscle aortic alpha-actin       | 1.07 ± 0.17 | 1.41 ± 0.74 | 1.03 ± 0.12 | 1.70 ± 0.40 |
| <i>Colla1</i> | Collagen, type I, alpha 1              | 1.14 ± 0.26 | 0.67 ± 0.25 | 1.06 ± 0.16 | 2.72 ± 0.87 |
| <i>S100a4</i> | S100 calcium-binding protein a4        | 1.04 ± 0.14 | 2.37 ± 1.10 | 1.07 ± 0.17 | 1.78 ± 0.45 |
| <i>Tgf-β</i>  | Transforming growth factor-beta        | 1.09 ± 0.20 | 1.00 ± 0.45 | 1.03 ± 0.11 | 1.92 ± 0.45 |
| <i>Vim</i>    | Type III intermediate filament protein | 1.03 ± 0.11 | 1.32 ± 0.56 | 1.08 ± 0.16 | 1.68 ± 0.38 |

FA, filtered air; TRAP, traffic-related air pollution; F, female; M, male
